# Supplementary material for: Energy Efficiency Trends in the Built-Environment Globally and in Egypt: A Literature Review
Source: Preprints.org preprint supplement (doi:10.20944/preprints202404.0147.v1), 2024-04-02
Supplement: Supplementary file 1 [file supplementary]

| Reference                                                     | Building Type                | Simulation Software                                                   | Cost analysis |
|---------------------------------------------------------------|------------------------------|-----------------------------------------------------------------------|---------------|
| (Hamza, Alsaadani and Fahmy, 2022)                            | Commercial                   | EnergyPlus                                                            | No            |
| (Mahdy <i>et al.</i> , 2022)                                  | Residential                  | EnergyPlus                                                            | No            |
| (GamalEldine and Corvacho, 2022)                              | Residential                  | EnergyPlus                                                            | No            |
| (Abdelraouf, Atef El-Desouky and Moustafa, 2022)              | Commercial                   | e-Quest                                                               | Yes           |
| (Anber, 2022b)                                                | Institutional                | EnergyPlus                                                            | No            |
| (Ramadan, 2022)                                               | Commercial                   | EnergyPlus                                                            | No            |
| (Anber and Khalifa, 2022)                                     | Residential                  | EnergyPlus                                                            | No            |
| (Eman, 2022b)                                                 | Institutional                | EnergyPlus                                                            | No            |
| (Omar, Khattab and Abdel Aleem, 2022b)                        | Institutional                | HOMER                                                                 | Yes           |
| (Emil and Diab, 2021b)                                        | Institutional                | EnergyPlus                                                            | Yes           |
| (El-Agami, Hanafy and Osman, 2021)                            | Commercial                   | EnergyPlus                                                            | No            |
| (Ahmad <i>et al.</i> , 2021)                                  | Residential                  | EnergyPlus                                                            | Yes           |
| (Nafeaa, Mohamed and Fatouha, 2020)                           | Residential                  | EnergyPlus                                                            | No            |
| (Osama El-Sherif, Mohamed and Fatouh, 2020)                   | Commercial                   | EnergyPlus                                                            | No            |
| (Mohamed Abdelsalam, Mohamed EL Razzaz and Elnekhailey, 2020) | Residential                  | EnergyPlus                                                            | No            |
| (Abd, Monem and Gindi, 2020)                                  | Commercial                   | EnergyPlus                                                            | No            |
| (Ragab and Abdelrady, 2020)                                   | Institutional                | EnergyPlus                                                            | Yes           |
| (Hegazy, 2020b)                                               | Residential                  | EnergyPlus                                                            | No            |
| (Hegazy, 2019)                                                | Institutional                | Ecotect                                                               | Yes           |
| (William <i>et al.</i> , 2020b)                               | Institutional                | EnergyPlus                                                            | Yes           |
| (William <i>et al.</i> , 2019)                                | Institutional                | EnergyPlus                                                            | No            |
| (Ahmed, 2019b)                                                | Institutional                | EnergyPlus                                                            | No            |
| (Shafei, Tawfik and Khalil, 2019)                             | Institutional                | EnergyPlus                                                            | No            |
| (Elhadad <i>et al.</i> , 2019)                                | Residential                  | IDA ICE                                                               | No            |
| (Mahmoud and Elkhairy, 2019)                                  | Commercial                   | EnergyPlus                                                            | No            |
| (Fahmy <i>et al.</i> , 2019)                                  | Commercial (Heritage)        | e-Quest                                                               | No            |
| (Samaan, Farag and Khalil, 2018b)                             | Institutional                | EnergyPlus                                                            | No            |
| (Fahmy <i>et al.</i> , 2018)                                  | Residential                  | EnergyPlus                                                            | No            |
| (Elhadad, Baranyai and Gyergyák, 2018)                        | Residential                  | IDA ICE                                                               | No            |
| (Khalil, Fikry and Abdeaal, 2018)                             | Residential                  | EnergyPlus                                                            | Yes           |
| (Ahmad and Reffat, 2018)                                      | Commercial                   | IES-VE                                                                | No            |
| (Albadry, Tarabieh and Sewilam, 2017)                         | Residential                  | EnergyPlus                                                            | Yes           |
| (Attia, Hamdy and Ezzeldin, 2017a)                            | Residential                  | EnergyPlus                                                            | No            |
| (El-Darwish and Gomaa, 2017b)                                 | Institutional                | EnergyPlus                                                            | No            |
| (Edeisy and Cecere, 2017)                                     | Residential                  | EnergyPlus                                                            | No            |
| (Aldali and Moustafa, 2016)                                   | Residential                  | Ecotect                                                               | No            |
| (Radwan <i>et al.</i> , 2016b)                                | Commercial and Institutional | HAP                                                                   | No            |
| (Reda <i>et al.</i> , 2015)                                   | Residential                  | TRNSYS                                                                | No            |
| (Dabaieh <i>et al.</i> , 2015)                                | Residential                  | EnergyPlus                                                            | Yes           |
| (Mourad <i>et al.</i> , 2014)                                 | Residential                  | ENER-WIN<br>(ENER-WIN, n.d.)                                          | No            |
| (Fahmy, Mahdy and Nikolopoulou, 2014)                         | Residential                  | EnergyPlus                                                            | No            |
| (Attia <i>et al.</i> , 2012)                                  | Residential                  | EnergyPlus                                                            | No            |
| (Nabih <i>et al.</i> , 2011b)                                 | Residential                  | Ecotect                                                               | No            |
| (Hanna, 2011)                                                 | Residential                  | Overall Thermal Transfer Value (OTTV) equations programmed into Excel | No            |
| (Michel and Elsayed, 2006)                                    | Residential                  | DOE-2                                                                 | No            |
