# Supplementary material for: Energy Efficiency Trends in the Built-Environment Globally and in Egypt: A Literature Review
Source: Preprints.org preprint supplement (doi:10.20944/preprints202404.0147.v1), 2024-04-02
Supplement: Supplementary file 2 [file supplementary]

| Reference                                                  | Building Type | Simulation Software | Cost analysis |
|------------------------------------------------------------|---------------|---------------------|---------------|
| (Watfa, Hawash and Jaafar, 2021)                           | Residential   | AECOSim             | Yes           |
| (Salameh <i>et al.</i> , 2020)                             | Commercial    | DOE-2               | No            |
| (Alhuwayil, Abdul Mujeebu and Algarny, 2019)               | Residential   | EnergyPlus          | Yes           |
| (Bataineh and Alrabee, 2018)                               | Residential   | EnergyPlus          | Yes           |
| (Friess, Rakhshan, Tamer A. Hendawi, <i>et al.</i> , 2012) | Residential   | EnergyPlus          | No            |
| (Ihm and Krarti, 2012)                                     | Residential   | DOE-2               | No            |
