# Supplementary material for: Energy Efficiency Trends in the Built-Environment Globally and in Egypt: A Literature Review
Source: Preprints.org preprint supplement (doi:10.20944/preprints202404.0147.v1), 2024-04-02
Supplement: Supplementary file 3 [file supplementary]

| AEDG               | Building Category                           | Guide Scope                                                                                                                                                                                                                                                                                                                                                                             | Date Published |
|--------------------|---------------------------------------------|-----------------------------------------------------------------------------------------------------------------------------------------------------------------------------------------------------------------------------------------------------------------------------------------------------------------------------------------------------------------------------------------|----------------|
| 30% Energy savings | Small Office Buildings                      | This guide is intended for office buildings that have a total area of up to 20,000 ft <sup>2</sup> and uses unitary heating, ventilation, and air conditioning (HVAC) equipment.                                                                                                                                                                                                        | 14/8/2008      |
|                    | Small Retail Buildings                      | This guide is intended for small retail buildings that have a total area of up to 20,000 ft <sup>2</sup> and uses unitary HVAC equipment.                                                                                                                                                                                                                                               | 14/8/2008      |
|                    | K-12 School Buildings                       | This guide is intended for elementary, middle, and high schools' buildings. Its guidelines only apply to classrooms, administrative spaces, assembly spaces, gymnasiums, hallways, kitchens, media centers and science labs. It does not apply to wet labs, dry labs, indoor pools or any other area with special HVAC or contamination control requirements.                           | 14/8/2008      |
|                    | Small Warehouses and Self-Storage Buildings | This guide is intended for warehouse with an area of up to 50,000 ft <sup>2</sup> and self-storage buildings with unitary HVAC equipment. It excludes special warehouses such as refrigerated warehouses and unheated ones.                                                                                                                                                             | 14/8/2008      |
|                    | Highway Lodging                             | This guide is intended for hotels found along highways, consisting of up to 80 rooms and going up for four stories or less. It excludes hotels with significant commercial cooking or refrigeration equipment.                                                                                                                                                                          | 9/6/2009       |
|                    | Small Hospital and Healthcare Facilities    | This guide is intended for small healthcare facilities of area up to 90,000 ft <sup>2</sup> . It includes critical access hospitals with 25 beds or less and medical office buildings of area greater than 20,000 ft <sup>2</sup> . The guidelines in this guide does not address steam heat and sewage disposal.                                                                       | 5/11/2009      |
| 50% Energy Savings | Small to Medium Office Buildings            | This guide is intended for office buildings with a total area up to 100,000 ft <sup>2</sup> . It applies to all types of offices including medical offices without medical examination equipment. The guidelines exclude specialty areas such as data centers.                                                                                                                          | 28/4/2011      |
|                    | K-12 School Buildings                       | This guide is intended for elementary, middle, and high school buildings of all sizes. Like the 30% Energy Savings Guide for K-12 schools, the guidelines of this guide exclude wet labs, dry labs, indoor pools or any other area with special HVAC or contamination control requirements.                                                                                             | 28/9/2011      |
|                    | Medium to Big Box Retail Buildings          | This guide is intended for retail stores with a total area 20,000 ft <sup>2</sup> -100,000 ft <sup>2</sup> . The guide also covers smaller or larger stores with similar space types. It, however, excludes areas with special HVAC and contamination control requirements such as commercial kitchens. It also excludes centralized refrigeration systems.                             | 30/12/2011     |
|                    | Large Hospitals                             | This guide is intended for medium and large hospitals which are typically at least 100,000 ft <sup>2</sup> .                                                                                                                                                                                                                                                                            | 1/5/2012       |
|                    | Grocery Stores                              | This guide is intended for grocery stores of area 25,000-65,000 ft <sup>2</sup> and have medium or low temperature refrigerated cases and walk-ins. This guide applies to smaller or larger stores with similar space types. It covers administrative places, dining facilities, medical spaces, sterilization area, storage areas, equipment spaces, pharmacies, and labs.             | 18/3/2015      |
| Zero Energy        | K-12 School Buildings                       | This guide is intended for elementary, middle, and high school buildings of all sizes. Like the 30% and 50% Energy Savings Guides for K-12 schools, the guidelines of this guide exclude wet labs, dry labs, indoor pools or any other area with special HVAC or contamination control requirements.                                                                                    | 11/1/2018      |
|                    | Small to Medium Office Buildings            | This guide is intended for offices with total area 10,000 ft <sup>2</sup> -100,000ft <sup>2</sup> and building height less than 75 ft. The guide also applies to large office buildings that are made up of sections of the same size range. The recommendations of this guide exclude food service or labs or any other areas with special HVAC or contamination control requirements. | 14/6/2019      |
|                    | Multifamily Buildings                       | This guide is intended for residential buildings covered by ANSI/ASHRAE/IES Standard 90.1 which go up to 20 floors. The guidelines exclude indoor pools, food service and domestic water well pumping and sewerage disposal areas.                                                                                                                                                      | 14/4/2022      |
