# Supplementary material for: Energy Efficiency Trends in the Built-Environment Globally and in Egypt: A Literature Review
Source: Preprints.org preprint supplement (doi:10.20944/preprints202404.0147.v1), 2024-04-02
Supplement: Supplementary file 4 [file supplementary]

| Rating System, Country of Origin, & Source                                                                                                                                      | Development Basis        | Categories & Weights <sup>1</sup>                                                                                                                                                                                                                                             | Scope                                                                                                                                                                                                                                                                                                                                                                                                                                                                                             |
|---------------------------------------------------------------------------------------------------------------------------------------------------------------------------------|--------------------------|-------------------------------------------------------------------------------------------------------------------------------------------------------------------------------------------------------------------------------------------------------------------------------|---------------------------------------------------------------------------------------------------------------------------------------------------------------------------------------------------------------------------------------------------------------------------------------------------------------------------------------------------------------------------------------------------------------------------------------------------------------------------------------------------|
| BREEAM v6.0 (UK)<br>(Fowler and Rauch, 2006; Rezaallah and Khoraskani, 2012; Ferreira <i>et al.</i> , 2023; <i>BREEAM-SE New Construction v6.0 Technical Manual 1.1</i> , 2023) | Original                 | Management – 10.82%<br>Health and Wellbeing – 17.53%<br>Energy – 18.4%<br>Transport – 7.65%<br>Water – 3.94%<br>Materials – 16.73%<br>Waste – 7.87%<br>Land Use and Ecology – 9.84%<br>Pollution – 7.22%<br>Innovation (Bonus) – 10%                                          | Communities<br>Infrastructure<br>New Construction (residential and commercial)<br>In-Use (commercial)<br>Refurbishment and Fit Out (residential and commercial)                                                                                                                                                                                                                                                                                                                                   |
| LEED v4 (US)<br>(‘LEED v4 BDC Reference Guide’, 2013; ‘LEED v4 for Homes Design and Construction Checklist’, 2014; Mohamed, Alwan and Marzouk, 2018)                            | Original                 | Integrative Process – 2%<br>Location & Transportation – 15%<br>Sustainable Sites – 7%<br>Water Efficiency – 12%<br>Energy & Atmosphere – 37%<br>Materials & Resources – 9%<br>Indoor Environmental Quality – 18%<br>Innovation (Bonus) – 6%<br>Regional Priority (Bonus) – 4% | Building Design and Construction (core and shell, schools, healthcare, retail, data centers, hospitality, warehouses, and distribution centers)<br>Interior Design and Construction (commercial, retail & hospitality)<br>Operation and Maintenance (existing buildings, existing interiors, schools, retail, data centers, hospitality, warehouses, and distribution centers)<br>Residential (single family & low to mid rise multifamily)<br>Neighborhood Development<br>Cities and Communities |
| CASBEE <sup>2</sup> (Japan)<br>(Fowler and Rauch, 2006; Dahal, 2017)                                                                                                            | Original                 | Indoor Environment<br>Quality of Service<br>On-site Environment<br>Energy<br>Resources and Materials<br>Off-site Environment                                                                                                                                                  | New Construction (buildings, detached houses & dwelling units)<br>Existing Buildings<br>Renovation (buildings & housing)<br>Temporary Construction<br>Urban Development<br>Cities                                                                                                                                                                                                                                                                                                                 |
| GREEN STAR v1.3 (Australia)<br>(Fowler and Rauch, 2006; Nguyen and Altan, 2011; ‘Design & As Built   Green Building Council of Australia’, 2017)                                | BREEAM LEED              | Management – 14%<br>Indoor Environmental Quality – 17%<br>Energy – 22%<br>Transport – 10%<br>Water – 12%<br>Materials – 14%<br>Land Use and Ecology – 6%<br>Emissions – 5%<br>Innovation (Bonus) – 10%                                                                        | Communities<br>Buildings – Design & As Built<br>Interiors<br>Performance – Existing Buildings                                                                                                                                                                                                                                                                                                                                                                                                     |
| DGNB version 2023 (Germany)<br>(‘DGNB System – Sustainable and green building’, 2020; DGNB SYSTEM KRIERIENKATALOG GEBAUDE NEUBAU, 2023; Ferreira <i>et al.</i> , 2023)          | Original                 | Process Quality – 12.5%<br>Site Quality – 5%<br>Environmental Quality – 22.5%<br>Social and Functional Quality – 22.5%<br>Technical Quality – 15%<br>Economic Quality – 22.5%                                                                                                 | Districts<br>Construction Sites<br>New Construction (office, residential, educational, hotel, consumer market, shopping center, department store, logistics, production, and assembly buildings)<br>Renovated and Existing Buildings<br>Interiors<br>Buildings in Use<br>Deconstruction of Buildings                                                                                                                                                                                              |
| PRS v1.0 (UAE)<br>( <i>The Pearl Rating System for Estidama Building Rating System Design &amp; Construction</i> , 2010; Ramani and Garcia De Soto, 2021)                       | BREEAM LEED <sup>3</sup> | Integrated Development Process – 7%<br>Natural Systems – 7%<br>Livable Buildings – 21%<br>Precious Water – 24%<br>Resourceful Energy – 25%<br>Stewarding Materials – 16%<br>Innovating Practice (Bonus) – 2%                                                                  | Design and Construction (villa, building, community)<br>Public Realm                                                                                                                                                                                                                                                                                                                                                                                                                              |
| MOSTADAM V1.1 (Saudi Arabia)<br>( <i>Mostadam Rating System Residential Buildings D+C Manual</i> , 2019)                                                                        | BREEAM LEED              | Site Sustainability – 9%<br>Transportation and Connectivity – 7%<br>Region and Culture – 7%<br>Energy – 27%<br>Water – 24%<br>Health and Comfort – 14%<br>Materials and Waste – 4%                                                                                            | Design and Construction (communities, residential & commercial)<br>Operation and Existing (communities, residential & commercial)                                                                                                                                                                                                                                                                                                                                                                 |

<sup>1</sup> The weights presented are for multi-family residential buildings if available.

|                                                                                                                                                                                              |                                                                                          |                                                                                                                                                                                                                          |                                                                  |
|----------------------------------------------------------------------------------------------------------------------------------------------------------------------------------------------|------------------------------------------------------------------------------------------|--------------------------------------------------------------------------------------------------------------------------------------------------------------------------------------------------------------------------|------------------------------------------------------------------|
|                                                                                                                                                                                              |                                                                                          | Education and Innovation – 4%<br>Policies, Management and Maintenance – 4%                                                                                                                                               |                                                                  |
| GPRS v2<br>(Egypt)<br>(Harb, 2019; HBRC, 2019)                                                                                                                                               | LEED                                                                                     | Sustainable Site – 10%<br>Energy Efficiency – 28%<br>Water Efficiency – 30%<br>Materials & Resources – 12%<br>Indoor Environmental Quality – 12%<br>Management Protocols – 8%<br>Innovation and Added Value (Bonus) – 5% | New Construction                                                 |
| TARSHEED<br>(Egypt)<br>(Harb, 2019; BUILD ME<br>Project-Phase II Status of<br>Energy Efficiency in the<br>Egyptian Building Sector<br>Dr. Dalia Sakr, Egypt Green<br>Building Council, 2020) | The<br>Excellence in<br>Design for<br>Greater<br>Efficiencies<br>(EDGE) rating<br>system | Energy – 46%<br>Water – 19%<br>Habitat – 35%                                                                                                                                                                             | Residential<br>Commercial<br>Communities<br>School<br>Healthcare |

---

<sup>2</sup> The weight of each category varies depending on the project.

<sup>3</sup> Author's observation
