# Supplementary material for: Energy Efficiency Trends in the Built-Environment Globally and in Egypt: A Literature Review
Source: Preprints.org preprint supplement (doi:10.20944/preprints202404.0147.v1), 2024-04-02
Supplement: Supplementary file 5 [file supplementary]

| Reference                                     | Building Type              | Simulation Software                                            | Cost analysis |
|-----------------------------------------------|----------------------------|----------------------------------------------------------------|---------------|
| (Abouaiana and Mendonça, 2022)                | Residential                | EnergyPlus                                                     | Yes           |
| (Kini <i>et al.</i> , 2021)                   | Institutional              | EnergyPlus                                                     | No            |
| (Sim, Suh and Otto, 2021)                     | Institutional              | Design Builder                                                 | Yes           |
| (Giouri, Tenpierik and Turrin, 2020)          | Commercial                 | EnergyPlus                                                     | No            |
| (Rodrigues <i>et al.</i> , 2019)              | Residential and Commercial | EnergyPlus                                                     | No            |
| (Ascione <i>et al.</i> , 2019)                | Residential                | EnergyPlus                                                     | Yes           |
| (Chen <i>et al.</i> , 2019)                   | Commercial                 | EnergyPlus                                                     | No            |
| (Chen and Yang, 2018)                         | Residential                | EnergyPlus                                                     | No            |
| (Li, Wang and Cheung, 2018)                   | Commercial                 | EnergyPlus                                                     | No            |
| (Yao <i>et al.</i> , 2018)                    | Residential                | EnergyPlus                                                     | No            |
| (Zhang <i>et al.</i> , 2018)                  | Generic                    | Window 7.4<br>(Lawrence Berkeley National<br>Laboratory, 2019) | No            |
| (Gou <i>et al.</i> , 2018)                    | Residential                | EnergyPlus                                                     | No            |
| (Song <i>et al.</i> , 2017)                   | Commercial                 | TRNSYS                                                         | Yes           |
| (Chen and Yang, 2017)                         | Residential                | EnergyPlus                                                     | No            |
| (Chen and Yang, 2016)                         | Residential and Commercial | DOE-2<br>(York and Capiello, 1981)                             | No            |
| (Aparicio Ruiz <i>et al.</i> , 2016)          | Residential                | LIDER-CALENER                                                  | No            |
| (Ascione <i>et al.</i> , 2016)                | Residential                | EnergyPlus                                                     | No            |
| (Carreras <i>et al.</i> , 2016)               | Generic                    | EnergyPlus                                                     | Yes           |
| (Ascione <i>et al.</i> , 2015)                | Residential                | EnergyPlus                                                     | Yes           |
| (Ioannou and Itard, 2015)                     | Residential                | EnergyPlus                                                     | No            |
| (Huang, Niu and Chung, 2014)                  | Commercial                 | EnergyPlus                                                     | No            |
| (Pikas, Thalfeldt and Kurnitski, 2014)        | Commercial                 | IDA-ICE<br>(Kalamees, 2004)                                    | Yes           |
| (Susorova <i>et al.</i> , 2013)               | Commercial                 | EnergyPlus                                                     | No            |
| (Calleja Rodríguez <i>et al.</i> , 2013)      | Residential                | EnergyPlus                                                     | No            |
| (Aldawoud, 2013)                              | Generic                    | DOE-2                                                          | No            |
| (Kim <i>et al.</i> , 2012)                    | Commercial                 | DOE-2                                                          | Yes           |
| (Griego, Krarti and Hernández-Guerrero, 2012) | Residential                | EnergyPlus                                                     | Yes           |
| (Roetzel and Tsangrassoulis, 2012)            | Commercial                 | EnergyPlus                                                     | No            |
| (Bambrook, Sproul and Jacob, 2011)            | Residential                | IDA-ICE                                                        | Yes           |
| (Bichiou and Krarti, 2011)                    | Residential                | DOE-2                                                          | No            |
| (Jaber and Ajib, 2011)                        | Residential                | TRNSYS                                                         | Yes           |
| (Yıldız and Arsan, 2011)                      | Residential                | EnergyPlus                                                     | No            |
| (Zemella <i>et al.</i> , 2011)                | Commercial                 | EnergyPlus                                                     | No            |
| (Palmero-Marrero and Oliveira, 2010)          | Generic                    | TRNSYS                                                         | No            |
| (Wang, Gwilliam and Jones, 2009)              | Residential                | EnergyPlus                                                     | No            |
| (Sailor, 2008)                                | Commercial                 | EnergyPlus                                                     | No            |
| (Gratia and De Herde, 2007)                   | Commercial                 | TAS<br>(Jones, 2000)                                           | No            |
| (Li and Wong, 2007)                           | Generic                    | EnergyPlus                                                     | No            |
| (Tavares and Martins, 2007)                   | Institutional              | VisualDOE™                                                     | No            |
| (Yik and Bojić, 2006b)                        | Residential                | EnergyPlus                                                     | No            |
| (Cheung, Fuller and Luther, 2005)             | Residential                | TRNSYS                                                         | No            |
| (Gratia, Bruyère and De Herde, 2004)          | Commercial                 | TAS                                                            | No            |
