# Supplementary material for: Energy Efficiency Trends in the Built-Environment Globally and in Egypt: A Literature Review
Source: Preprints.org preprint supplement (doi:10.20944/preprints202404.0147.v1), 2024-04-02
Supplement: Supplementary file 6 [file supplementary]

Archive with 14 entries (14 files):
- Figure 1 - Total Final Global Energy Consumption in 2021.jpg
- Figure 2 - Global Energy and Process CO2 Emissions in 2021.jpg
- Figure 3 - Quantities of Sold Energy by Purpose in 2020-2021.jpg
- Figure 4 - Global Simulation Studies by Building Type.jpg
- Figure 5 - Global Simulation Studies by Simulation Software.jpg
- Figure 6 - Global Simulation Studies based on Cost Analysis Performance.jpg
- Figure 7 - Local Simulation Studies by Building Type.jpg
- Figure 8 - Local Simulation Studies by Simulation Software.jpg
- Figure 9 - Local Simulation Studies based on Cost Analysis Performance.jpg
- Table 1 - Summary of ASHRAE Existing AEDGs.pdf
- Table 2 - Sustainable Building Rating System Comparison.pdf
- Table 3 - Global Studies Using Energy Modeling and Simulation.pdf
- Table 4 - Regional Studie Using Energy Modeling and Simulation.pdf
- Table 5 - Local Studies Using Energy Modeling and Simulation.pdf
