# Supplementary figures and images for: Energy Efficiency Trends in the Built-Environment Globally and in Egypt: A Literature Review
Source: Preprints.org preprint supplement (doi:10.20944/preprints202404.0147.v1), 2024-04-02

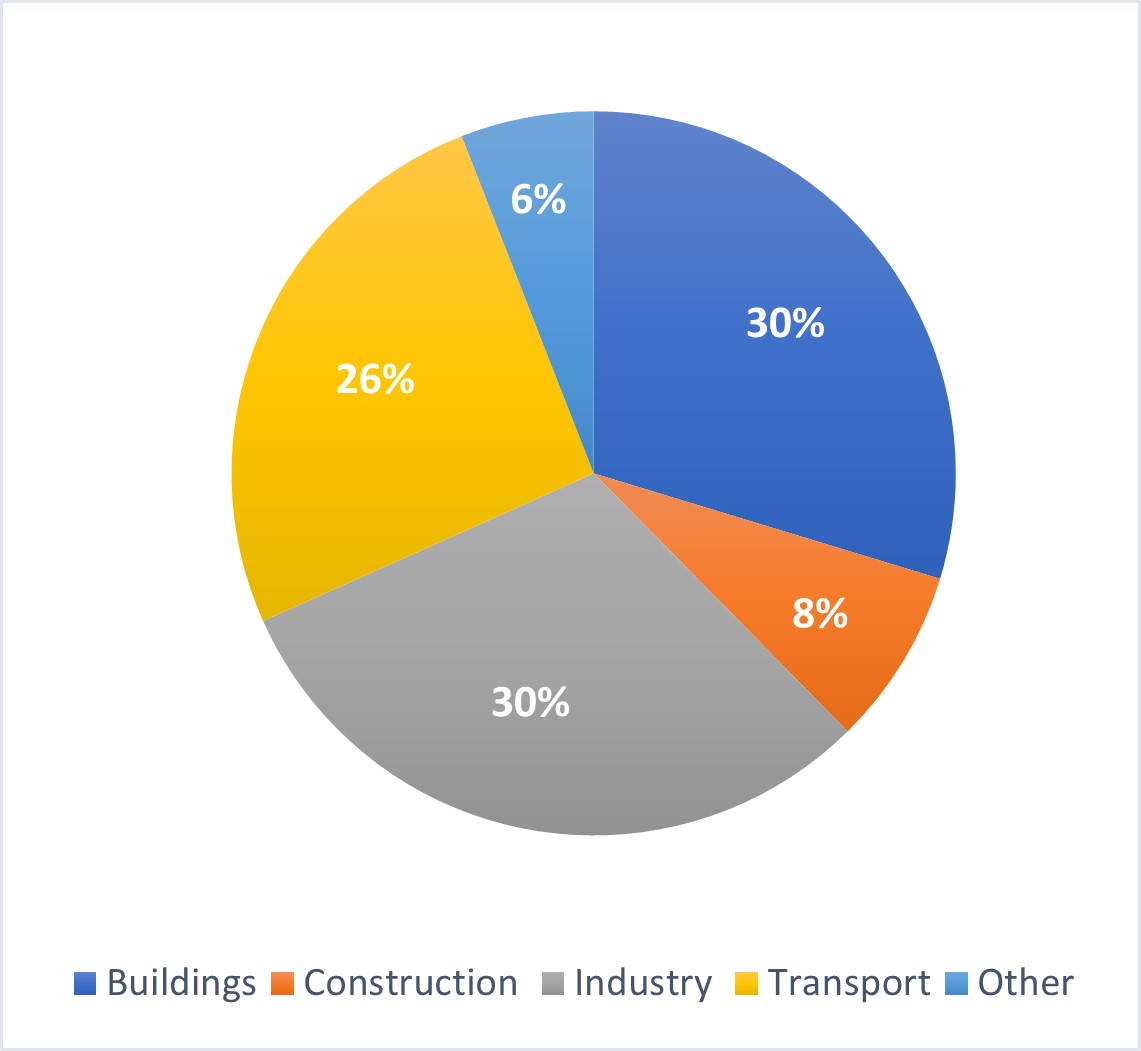

Supplement: Supplementary file 6 [file supplementary › Figure 1 - Total Final Global Energy Consumption in 2021.jpg]

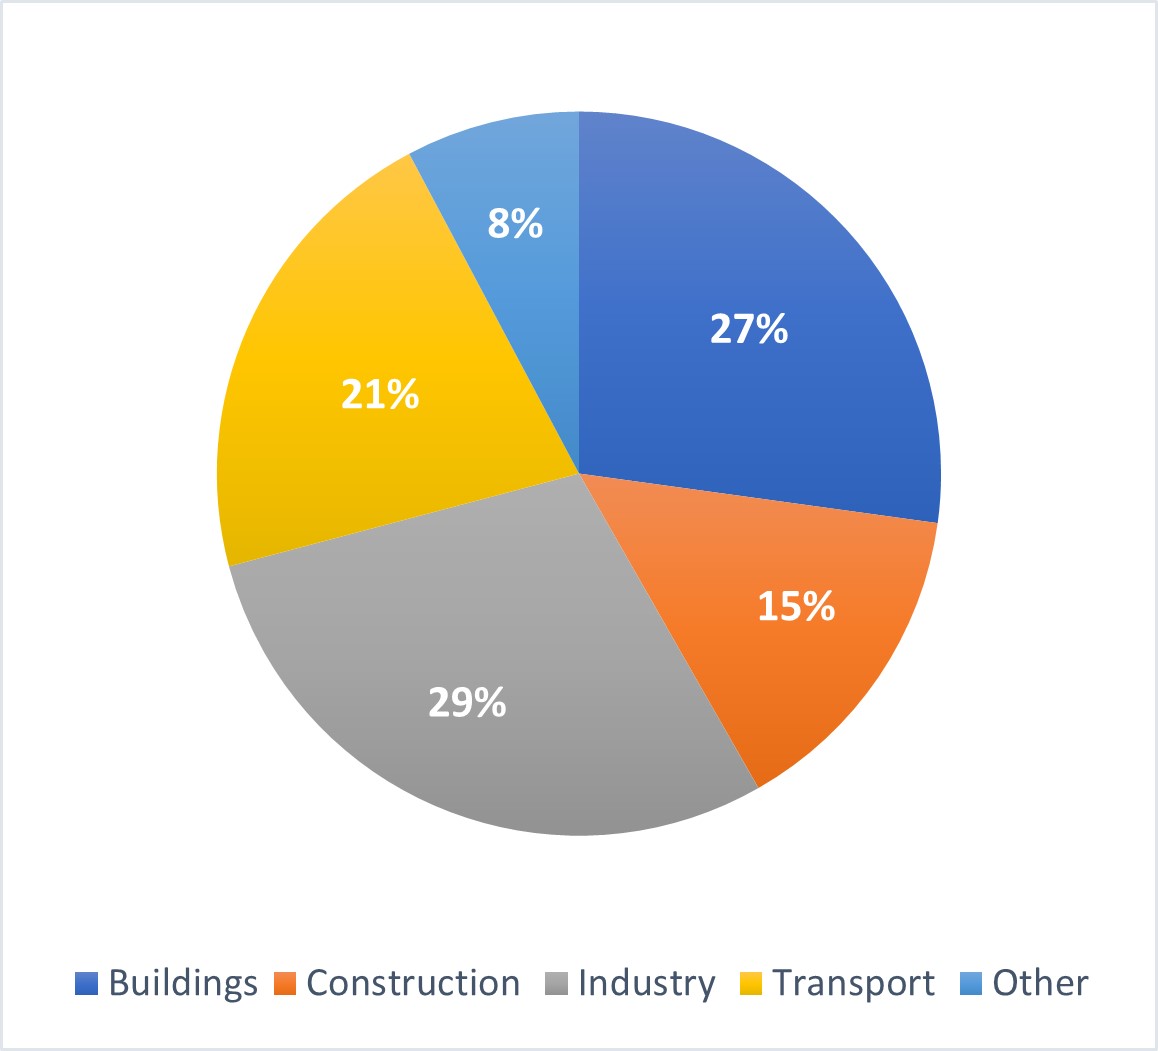

Supplement: Supplementary file 6 [file supplementary › Figure 2 - Global Energy and Process CO2 Emissions in 2021.jpg]

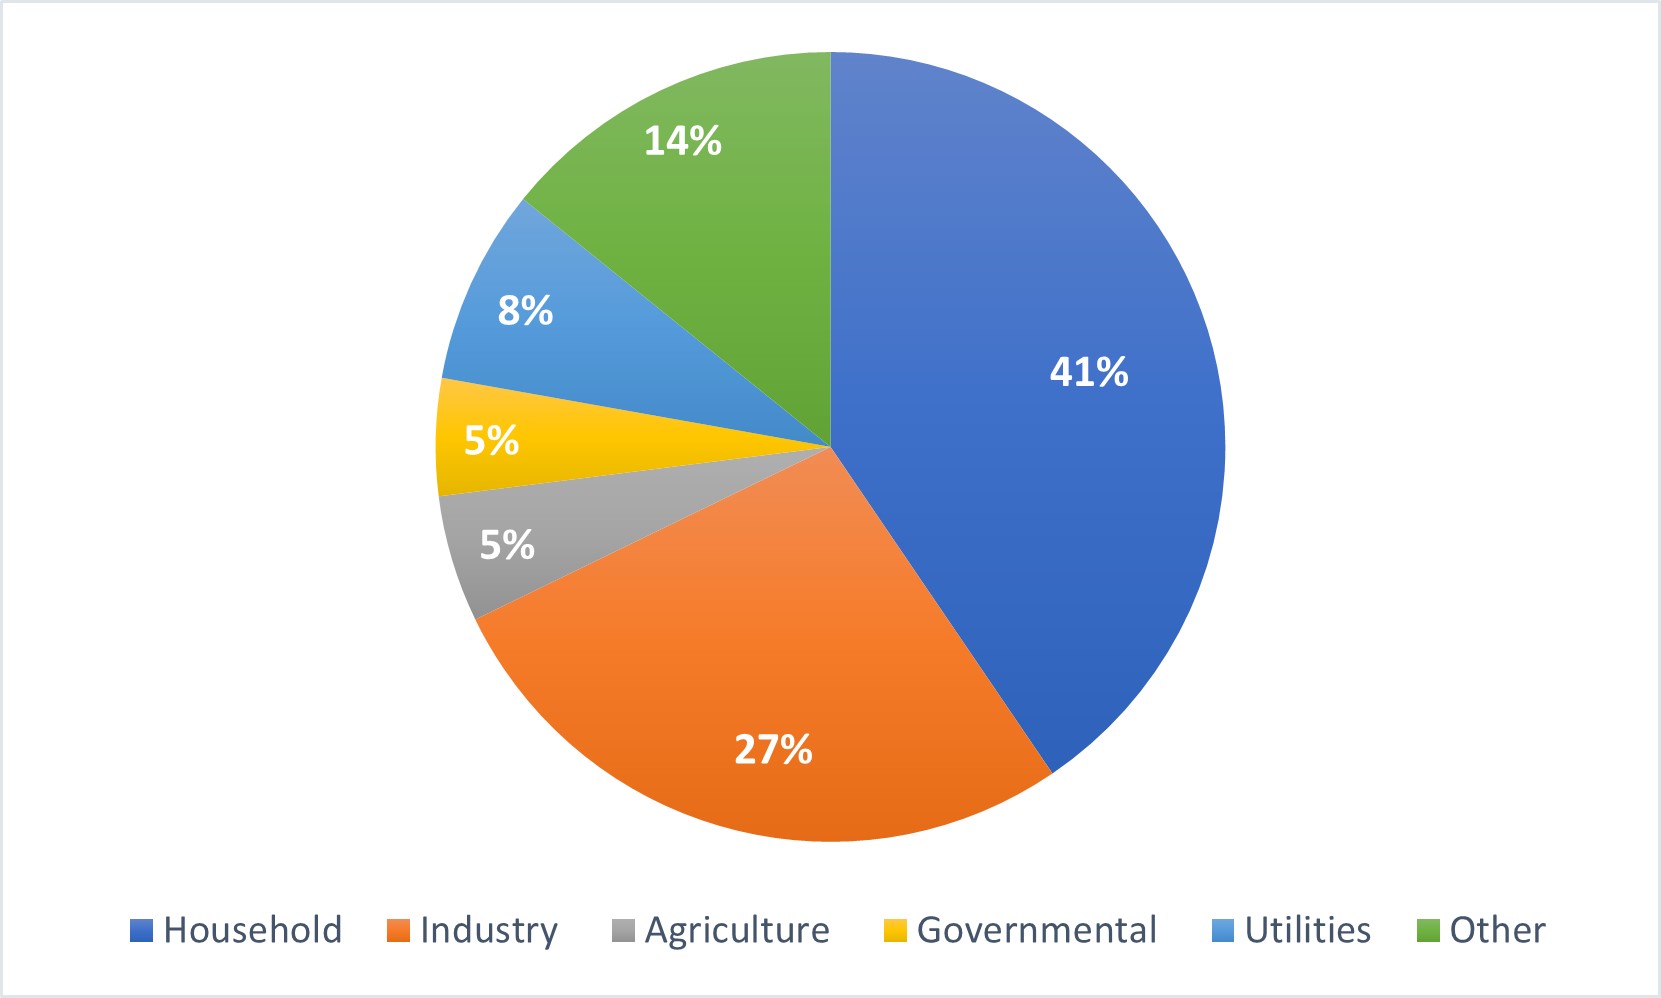

Supplement: Supplementary file 6 [file supplementary › Figure 3 - Quantities of Sold Energy by Purpose in 2020-2021.jpg]

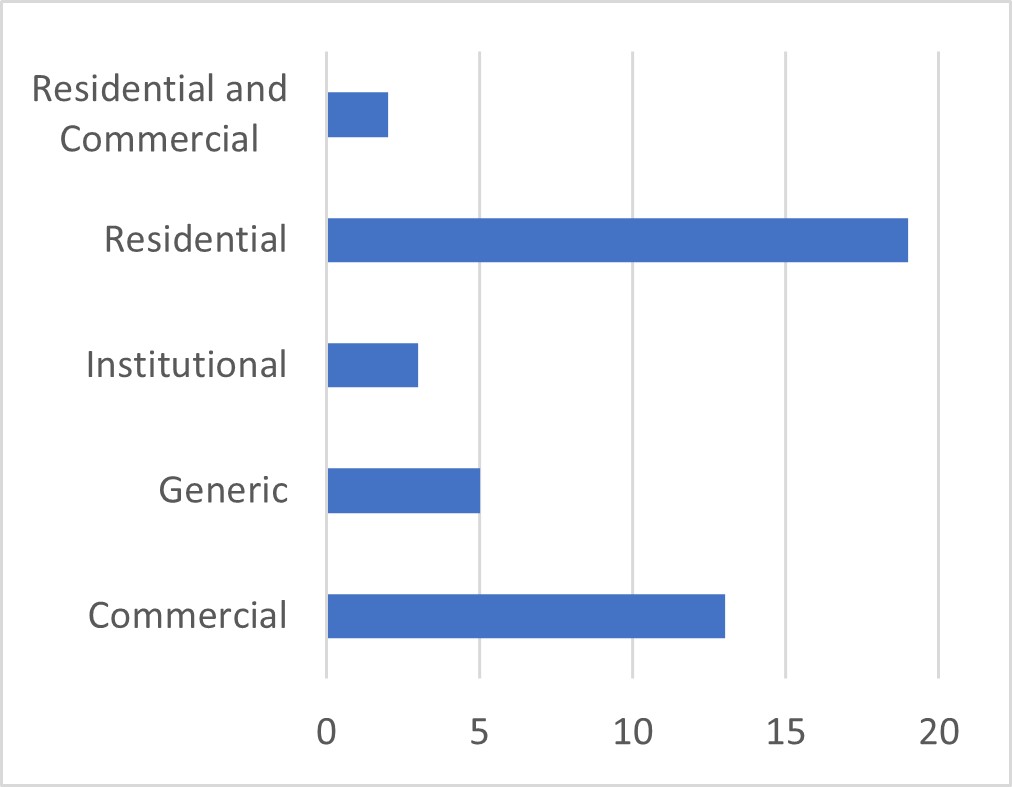

Supplement: Supplementary file 6 [file supplementary › Figure 4 - Global Simulation Studies by Building Type.jpg]

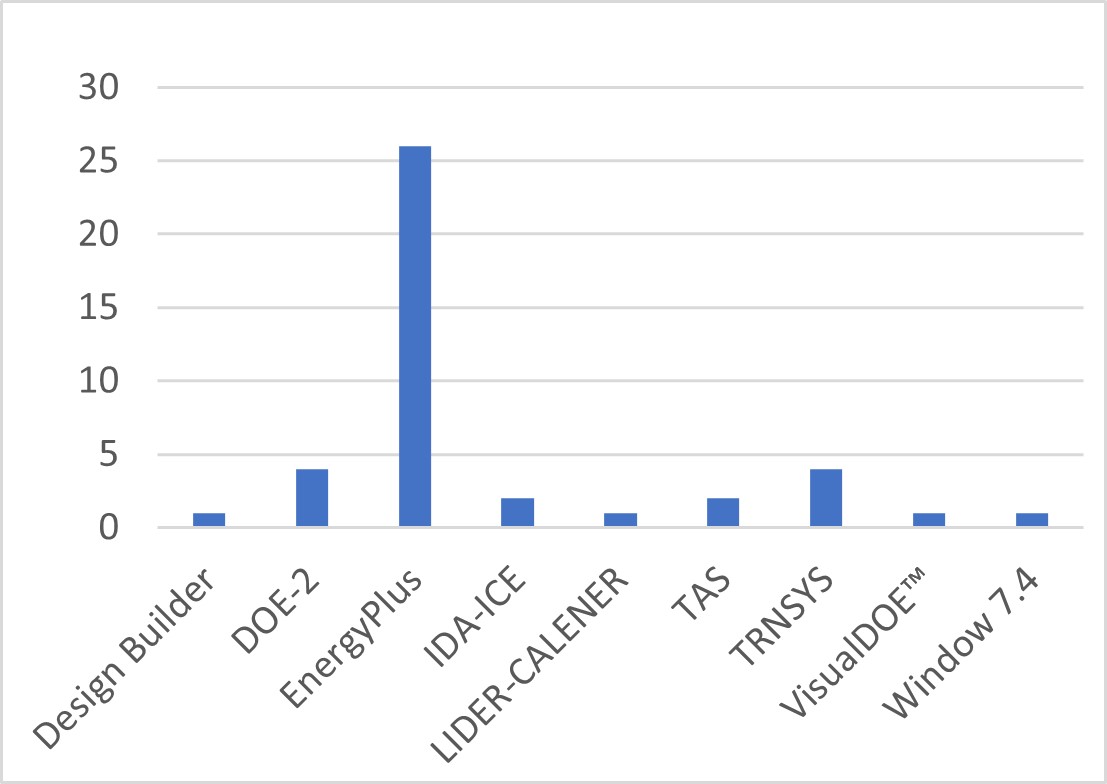

Supplement: Supplementary file 6 [file supplementary › Figure 5 - Global Simulation Studies by Simulation Software.jpg]

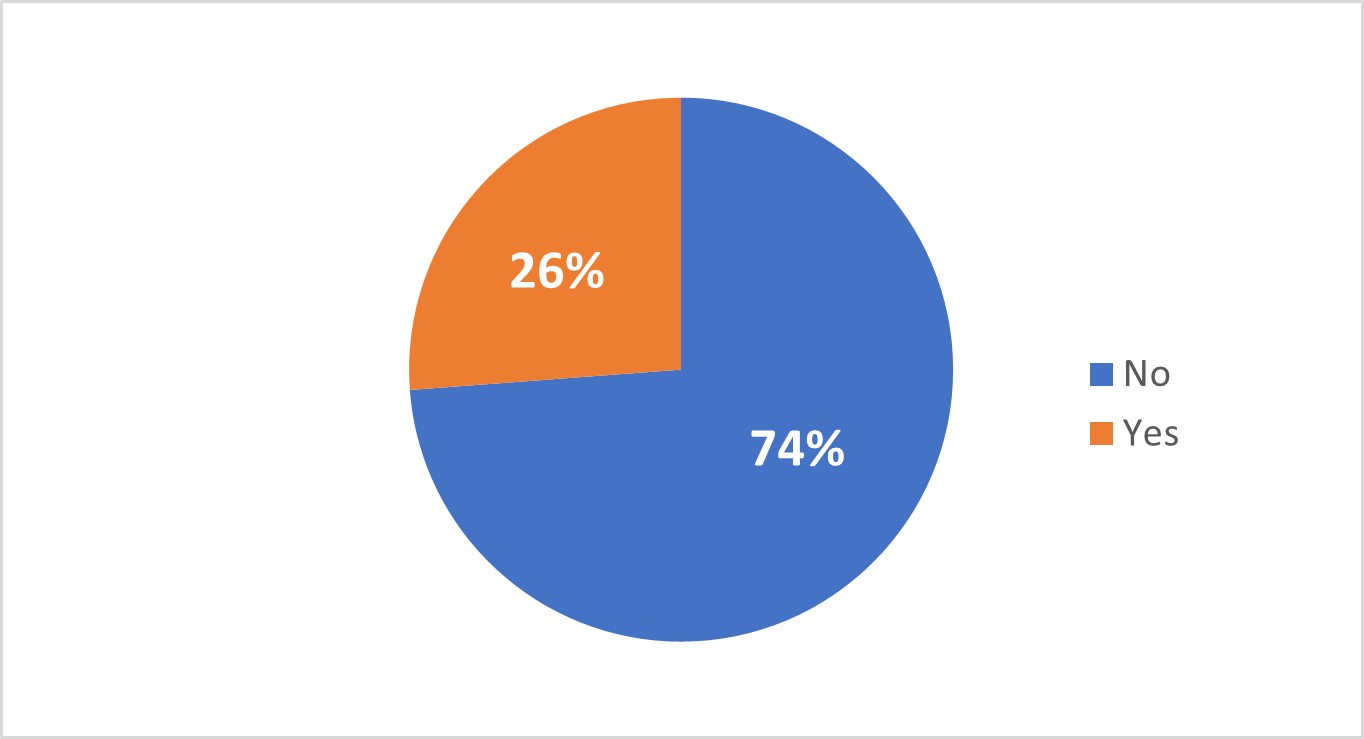

Supplement: Supplementary file 6 [file supplementary › Figure 6 - Global Simulation Studies based on Cost Analysis Performance.jpg]

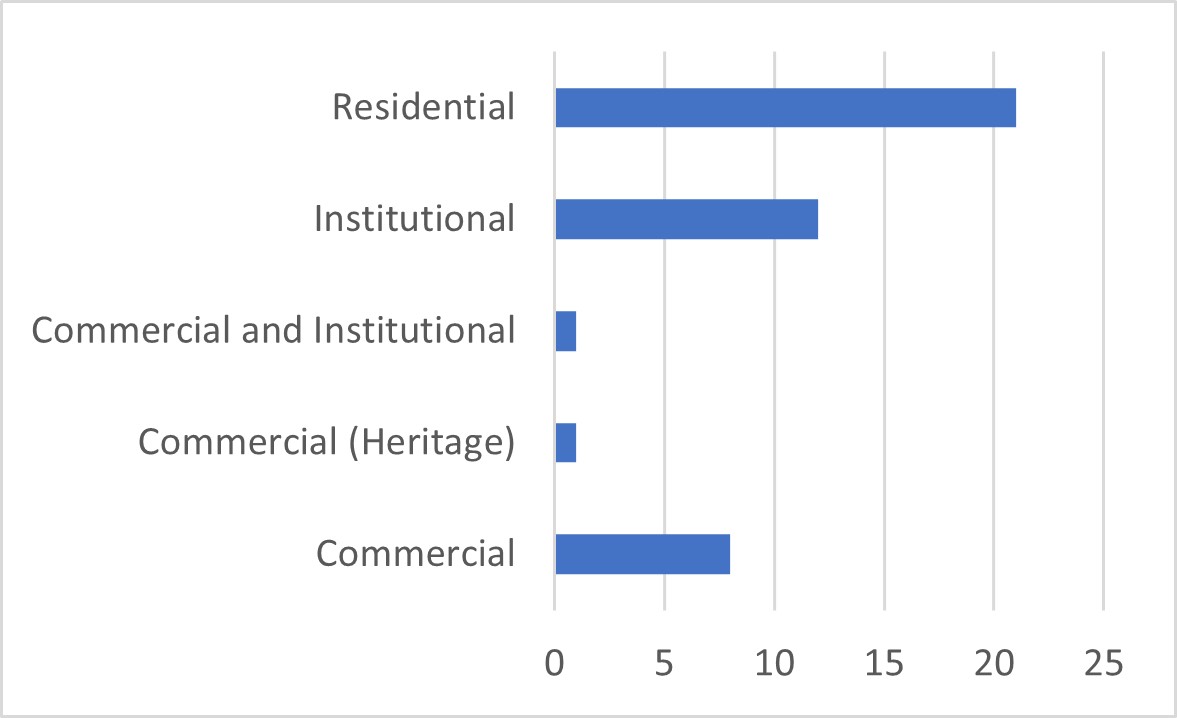

Supplement: Supplementary file 6 [file supplementary › Figure 7 - Local Simulation Studies by Building Type.jpg]

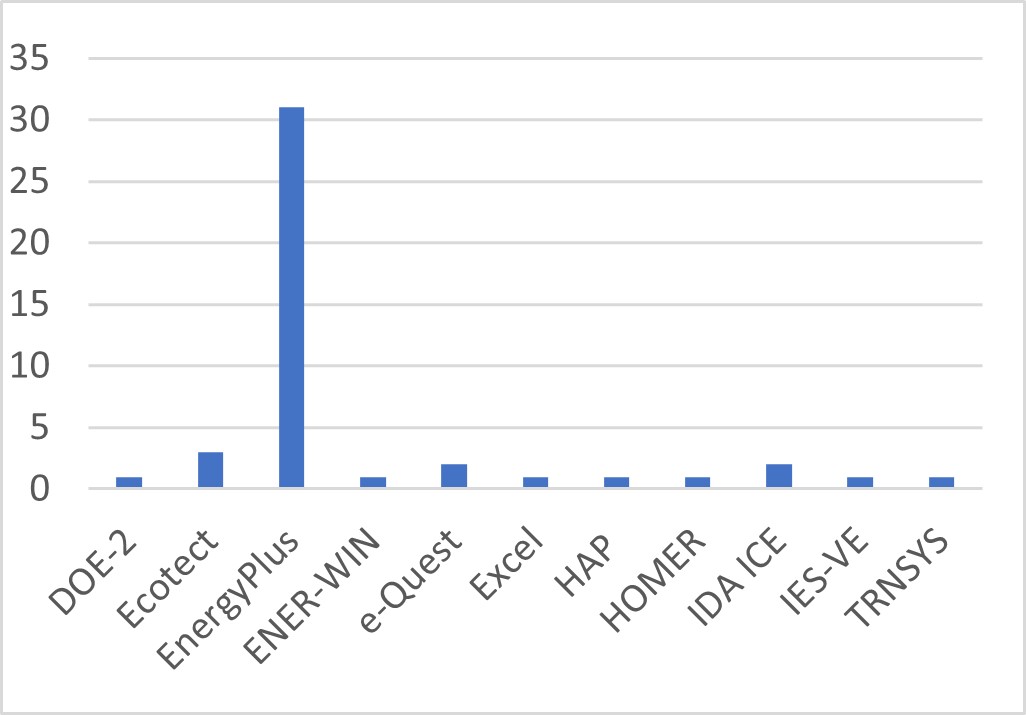

Supplement: Supplementary file 6 [file supplementary › Figure 8 - Local Simulation Studies by Simulation Software.jpg]

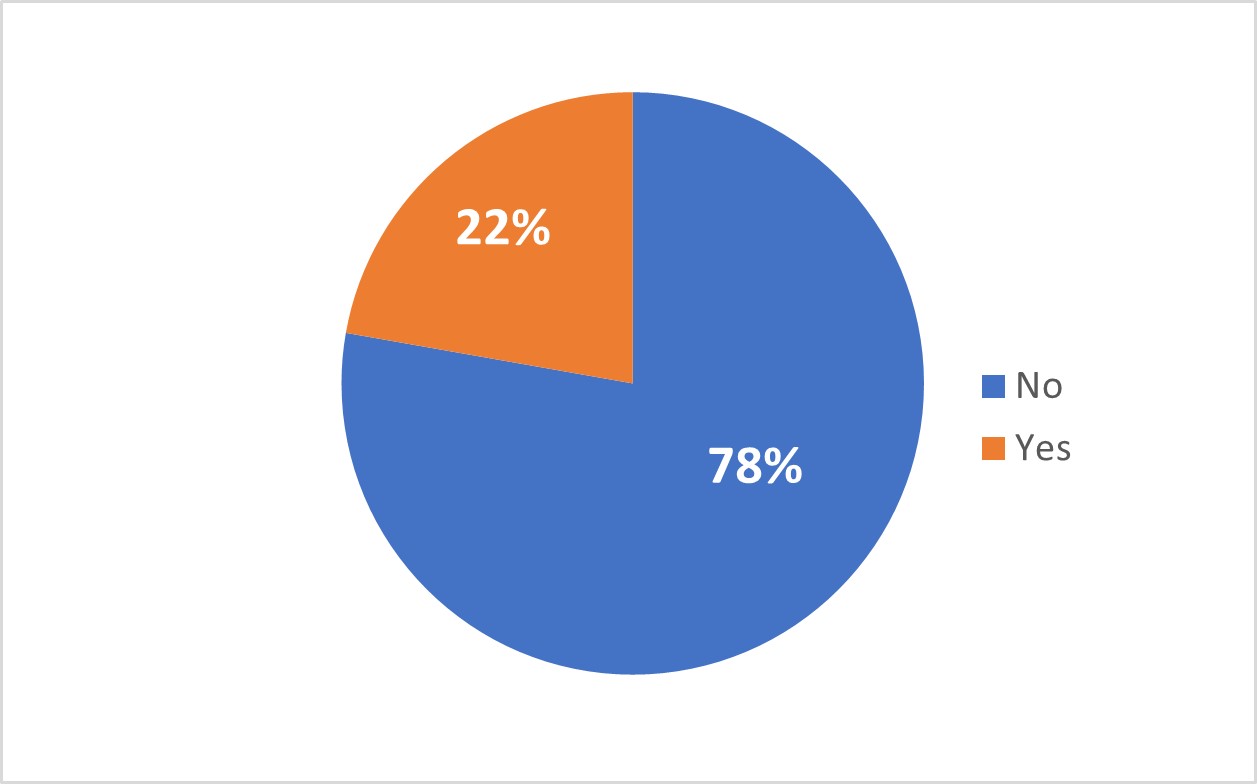

Supplement: Supplementary file 6 [file supplementary › Figure 9 - Local Simulation Studies based on Cost Analysis Performance.jpg]
